# Supplementary material for: Impact of sex and gender on post-COVID-19 syndrome, Switzerland, 2020
Source: PubMed Central journal article supplement (PMC10785203; doi:10.2807/1560-7917.es.2024.29.2.2300200), 2024-01-11
Supplement: 23-00200_GEBHARD_Supplement.pdf [file 23-00200_GEBHARD_Supplement.pdf]

## **Supplementary Materials**

This supplementary material is hosted by Eurosurveillance as supporting information alongside the article “Impact of sex and gender on post-COVID-19 syndrome, Switzerland, 2020”, on behalf of the authors, who remain responsible for the accuracy and appropriateness of the content. The same standards for ethics, copyright, attributions and permissions as for the article apply. Supplements are not edited by Eurosurveillance and the journal is not responsible for the maintenance of any links or email addresses provided therein.

**S 1:** Flowchart depicting patient selection. ICU, intensive care unit; IMC, intermediate care unit.

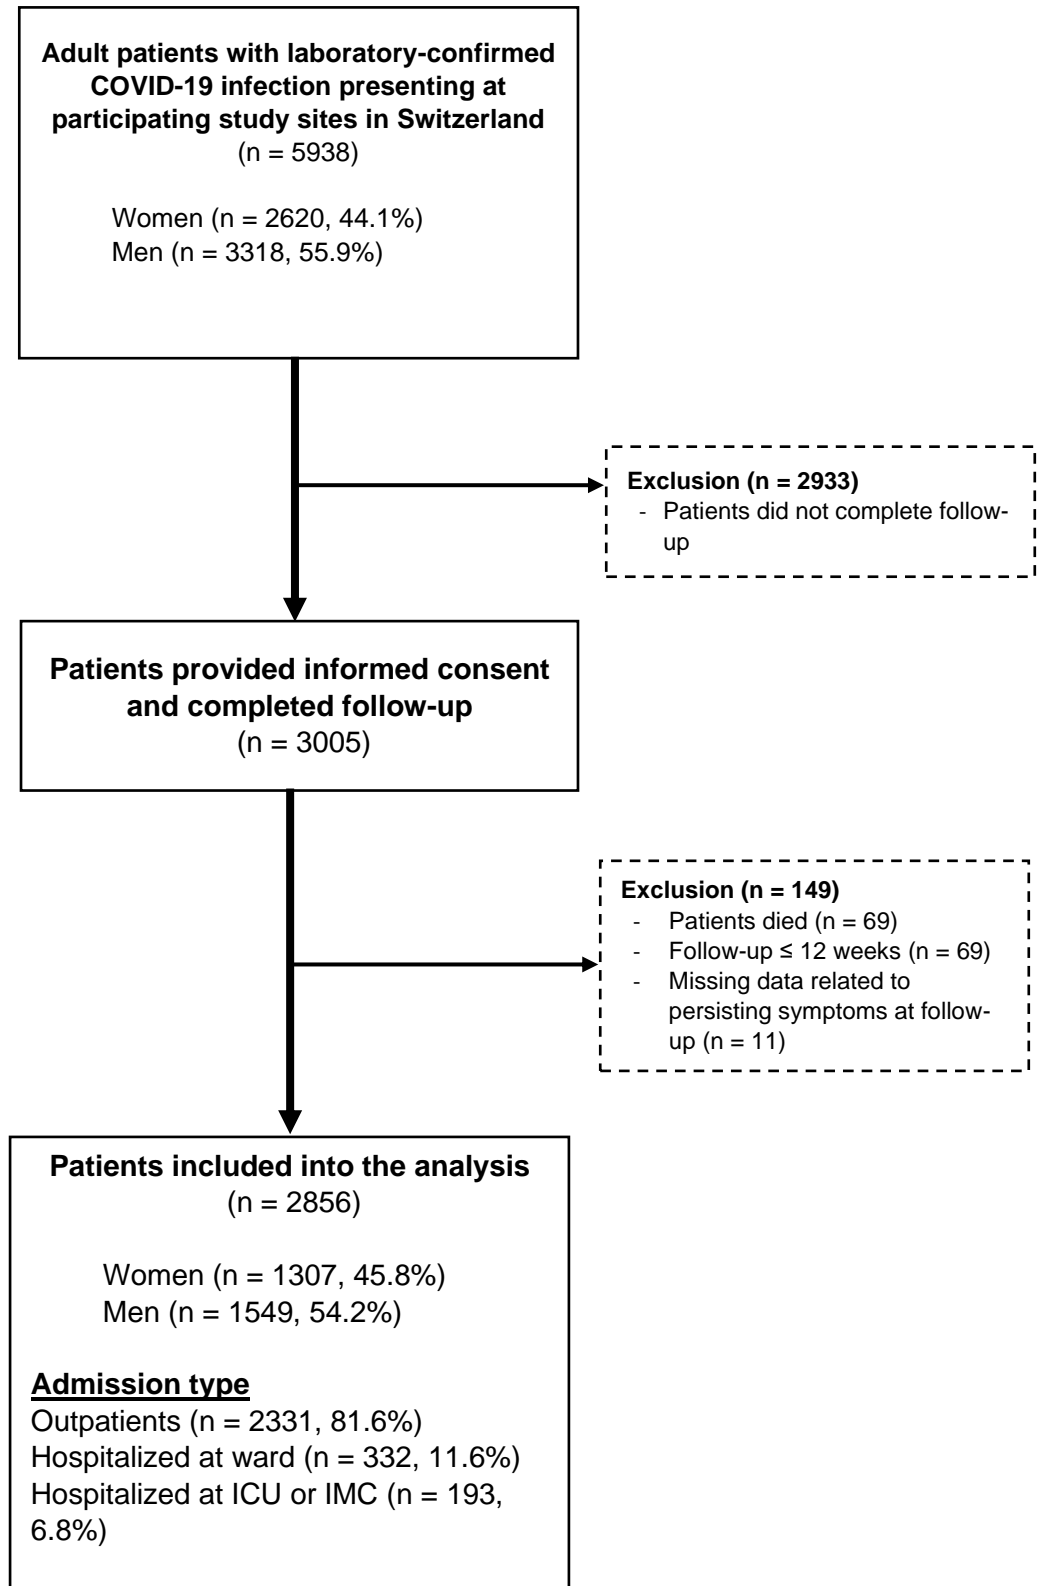



**S 3:** Full prediction model for the occurrence of PASC in outpatients. Risk ratios (RR) and 95% confidence intervals (CI) are depicted. The following independent variables were included in the analysis: biological sex, gender score (Model 1) or single features of the gender score (Model 2), age, acute COVID-19 symptoms, pre-existing comorbidities, prior medications, and cardiovascular risk factors. NS = not significant.

| Factors                                              | Bivariate analysis |         | Model 1 (n=2158)    |         | Model 2 (n=2298)    |         |
|------------------------------------------------------|--------------------|---------|---------------------|---------|---------------------|---------|
|                                                      | Crude RR (95%CI)   | p-value | Adjusted RR (95%CI) | p-value | Adjusted RR (95%CI) | p-value |
| Age (years)                                          | 1.003 (1.00, 1.01) | 0.212   | 1.00 (0.99, 1.004)  | 0.896   | 1.00 (0.99, 1.01)   | 0.464   |
| Female sex                                           | 1.59 (1.41, 1.79)  | <0.001  | 1.33 (1.16, 1.53)   | <0.001  | 0.96 (0.74, 1.25)   | 0.763   |
| Gender score (0=Masculine; 100=Feminine) x 10 scores | 1.05 (1.03, 1.07)  | <0.001  | 1.00 (0.97, 1.02)   | 0.959   |                     |         |
| <b>CV risk factors</b>                               |                    |         |                     |         |                     |         |
| Obesity (BMI≥30 kg/m <sup>2</sup> )                  | 1.80 (1.42, 2.28)  | <0.001  | 1.34 (1.16, 1.54)   | <0.001  | 1.25 (1.08, 1.44)   | 0.002   |
| <b>Pre-existing comorbidities</b>                    |                    |         |                     |         |                     |         |
| Mental disorder                                      | 1.77 (1.40, 2.23)  | <0.001  | 1.35 (1.03, 1.76)   | 0.027   | 1.28 (0.99, 1.64)   | 0.056   |
| Autoimmune/Rheumatoid disease                        | 1.78 (1.50, 2.13)  | <0.001  | 1.35 (1.12, 1.64)   | 0.002   | 1.36 (1.14, 1.63)   | 0.001   |
| <b>Medications before COVID-19</b>                   |                    |         |                     |         |                     |         |
| Cardiovascular drugs                                 | 1.21 (1.02, 1.43)  | 0.028   |                     | NS      |                     | NS      |
| Asthma treatment                                     | 1.62 (1.29, 2.02)  | <0.001  |                     | NS      |                     | NS      |
| Analgetics                                           | 1.47 (1.25, 1.73)  | <0.001  |                     | NS      |                     | NS      |
| Immunosuppressive medication                         | 1.71 (1.27, 2.31)  | <0.001  |                     | NS      |                     | NS      |
| Antidepressants                                      | 1.64 (1.26, 2.12)  | <0.001  |                     | NS      |                     | NS      |
| Thyroid hormones                                     | 1.75 (1.38, 2.23)  | <0.001  |                     | NS      |                     | NS      |
| <b>Symptoms at presentation for acute COVID-19</b>   |                    |         |                     |         |                     |         |
| Anosmia/dysosmia                                     | 1.94 (1.70, 2.22)  | <0.001  | 1.74 (1.52, 2.00)   | <0.001  | 1.69 (1.48, 1.93)   | <0.001  |
| Gastrointestinal symptoms                            | 1.76 (1.57, 1.99)  | <0.001  | 1.32 (1.16, 1.50)   | <0.001  | 1.33 (1.18, 1.50)   | <0.001  |
| Dyspnea                                              | 2.13 (1.91, 2.38)  | <0.001  | 1.58 (1.41, 1.78)   | <0.001  | 1.60 (1.43, 1.80)   | <0.001  |
| Cough                                                | 1.35 (1.20, 1.51)  | <0.001  | 1.12 (0.99, 1.26)   | 0.062   | 1.12 (1.00, 1.26)   | 0.055   |
| Fatigue                                              | 1.83 (1.55, 2.16)  | <0.001  | 1.44 (1.22, 1.70)   | <0.001  | 1.44 (1.23, 1.70)   | <0.001  |
| <b>Sociocultural-and economic variables</b>          |                    |         |                     |         |                     |         |
| <b>Parenthood</b>                                    |                    |         |                     |         |                     |         |
| Two-parent family                                    | 1.00 (Reference)   |         |                     |         | 1.00 (Reference)    |         |
| Single-parent family                                 | 1.33 (1.10, 1.61)  | 0.003   |                     |         | 1.21 (1.00, 1.46)   | 0.050   |
| No children                                          | 1.06 (0.94, 1.20)  | 0.336   |                     |         | 1.16 (1.01, 1.33)   | 0.033   |
| <b>Education</b>                                     |                    |         |                     |         |                     |         |
| University or technical college degree               | 1.00 (Reference)   |         |                     |         | 1.00 (Reference)    |         |
| Non-University or technical college degree           | 1.23 (1.09, 1.39)  | 0.001   |                     |         | 1.16 (1.03, 1.30)   | 0.011   |
| Average domestic stress level                        | 1.08 (1.05, 1.11)  | <0.001  |                     |         | 1.04 (1.01, 1.06)   | 0.003   |
| <b>Interaction terms</b>                             |                    |         |                     |         |                     |         |
| Female:Lives alone                                   |                    |         |                     |         | 1.91 (1.29, 2.83)   | 0.001   |
| Male:Earns highest income in household               |                    |         |                     |         | 0.76 (0.60, 0.97)   | 0.030   |
| Male:Lives alone                                     |                    |         |                     |         | 0.54 (0.39, 0.75)   | <0.001  |

**S 4:** Full prediction model for the occurrence of PASC in hospitalized patients. Risk ratios (RR) and 95% confidence intervals (CI) are depicted. The following independent variables were included in the analysis: biological sex, gender score (Model 1) or single features of the gender score (Model 2), age, BMI, acute COVID-19 symptoms, pre-existing comorbidities, prior medications, cardiovascular risk factors, routine laboratory parameters during acute illness, hormone levels (testosterone, oestradiol, progesterone, and cortisol), and clinical data during acute illness. P/F ratio, PaO2/FiO2 ratio. NS = not significant.

| Factors                                                          | Bivariate analysis   |         | Model 1 (n=429)     |         | Model 2 (n=490)     |         |
|------------------------------------------------------------------|----------------------|---------|---------------------|---------|---------------------|---------|
|                                                                  | Crude RR (95%CI)     | p-value | Adjusted RR (95%CI) | p-value | Adjusted RR (95%CI) | p-value |
| Age (years)                                                      | 1.004 (1.00, 1.01)   | 0.147   | 1.003 (0.99, 1.01)  | 0.393   | 1.01 (1.00, 1.03)   | 0.121   |
| Female sex                                                       | 1.15 (0.99, 1.34)    | 0.058   | 1.20 (0.98, 1.46)   | 0.076   | 1.14 (0.97, 1.35)   | 0.120   |
| Gender score (0=Masculine - 100=Feminine) x 10 scores            | 1.01 (0.98, 1.04)    | 0.406   | 1.00 (0.96, 1.03)   | 0.795   |                     |         |
| <b>CV risk factors</b>                                           |                      |         |                     |         |                     |         |
| Hypertension                                                     | 1.23 (1.05, 1.44)    | 0.010   | 1.24 (1.03, 1.50)   | 0.023   | 1.19 (1.00, 1.41)   | 0.050   |
| <b>Medications before acute COVID-19</b>                         |                      |         |                     |         |                     |         |
| Cardiovascular drugs                                             | 1.19 (1.02, 1.38)    | 0.024   |                     | NS      |                     | NS      |
| Asthma treatment                                                 | 1.32 (1.09, 1.59)    | 0.004   |                     | NS      |                     | NS      |
| Analgetics                                                       | 1.20 (1.02, 1.41)    | 0.030   |                     | NS      |                     | NS      |
| <b>Symptoms at presentation for acute COVID-19</b>               |                      |         |                     |         |                     |         |
| Anosmia/dysosmia                                                 | 1.21 (1.05, 1.40)    | 0.008   | 1.19 (1.01, 1.40)   | 0.037   | 1.20 (1.03, 1.40)   | 0.021   |
| Gastrointestinal symptoms                                        | 1.32 (1.14, 1.52)    | <0.001  | 1.29 (1.10, 1.52)   | 0.001   | 1.27 (1.09, 1.47)   | 0.002   |
| Dyspnea                                                          | 1.44 (1.24, 1.68)    | <0.001  | 1.26 (1.05, 1.52)   | 0.014   | 1.26 (1.06, 1.48)   | 0.007   |
| Fatigue                                                          | 1.50 (1.22, 1.83)    | <0.001  | 1.34 (1.06, 1.69)   | 0.013   | 1.35 (1.09, 1.67)   | 0.006   |
| <b>Medical treatment of acute COVID-19</b>                       |                      |         |                     |         |                     |         |
| Corticosteroids                                                  | 1.23 (1.07, 1.43)    | 0.004   |                     | NS      |                     | NS      |
| Tocilizumab                                                      | 1.42 (1.19, 1.68)    | <0.001  |                     | NS      |                     | NS      |
| <b>Disease course of acute COVID-19</b>                          |                      |         |                     |         |                     |         |
| Invasive ventilation                                             | 1.56 (1.37, 1.78)    | <0.001  | 1.55 (1.32, 1.82)   | <0.001  | 1.53 (1.32, 1.77)   | <0.001  |
| <b>Sociocultural-and economic variables</b>                      |                      |         |                     |         |                     |         |
| <b>Parenthood</b>                                                |                      |         |                     |         |                     |         |
| Two-parent family                                                | 1.00 (Reference)     |         |                     |         |                     |         |
| Single-parent family                                             | 1.14 (0.89, 1.45)    | 0.294   |                     |         | 1.03 (0.80, 1.34)   | 0.796   |
| No children                                                      | 1.11 (0.92, 1.35)    | 0.258   |                     |         | 1.10 (0.89, 1.36)   | 0.378   |
| <b>Education</b>                                                 |                      |         |                     |         |                     |         |
| University or technical college degree                           | 1.00 (Reference)     |         |                     |         |                     |         |
| Non-University or technical college degree                       | 1.10 (0.91, 1.33)    | 0.307   |                     |         | 1.00 (0.82, 1.20)   | 0.966   |
| Average domestic stress level                                    | 1.03 (1.00, 1.06)    | 0.048   |                     |         | 1.00 (0.97, 1.04)   | 0.814   |
| <b>Laboratory and clinical parameters at 1st day in-hospital</b> |                      |         |                     |         |                     |         |
| Respiratory rate day 1 (per minute)                              | 1.015 (1.007, 1.022) | <0.001  |                     | NS      |                     | NS      |
| P/F ratio day 1                                                  | 0.998 (0.997, 0.999) | <0.001  |                     | NS      |                     | NS      |
| <b>Late presentation for acute COVID-19 (yes/no)</b>             | 1.16 (1.002, 1.34)   | 0.047   | 1.25 (1.06, 1.47)   | 0.008   |                     | NS      |
| <b>Hormones (Cortisol, Estradiol, Testosterone)</b>              |                      |         |                     |         |                     |         |
| Estradiol (E2, x 100 pmol/L)                                     | 1.08 (1.04, 1.12)    | <0.001  |                     | NS      |                     | NS      |
| <b>Interaction terms</b>                                         |                      |         |                     |         |                     |         |
| Female:Late presentation for acute COVID-19                      |                      |         |                     | NS      |                     |         |
